# Supplementary material
Source: Copernicus journal article supplement (doi:10.5194/wcd-7-1117-2026)
Supplement: Supplementary file 1 [file wcd-7-1117-2026-supplement.pdf]

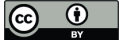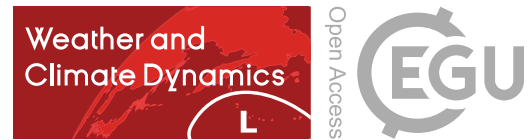

*Supplement of*

## **Distinct bias structures for extratropical cyclones with strong or weak diabatic heating**

**Qidi Yu et al.**

*Correspondence to:* Qidi Yu ([qidi.yu@uib.no](mailto:qidi.yu@uib.no))

The copyright of individual parts of the supplement might differ from the article licence.

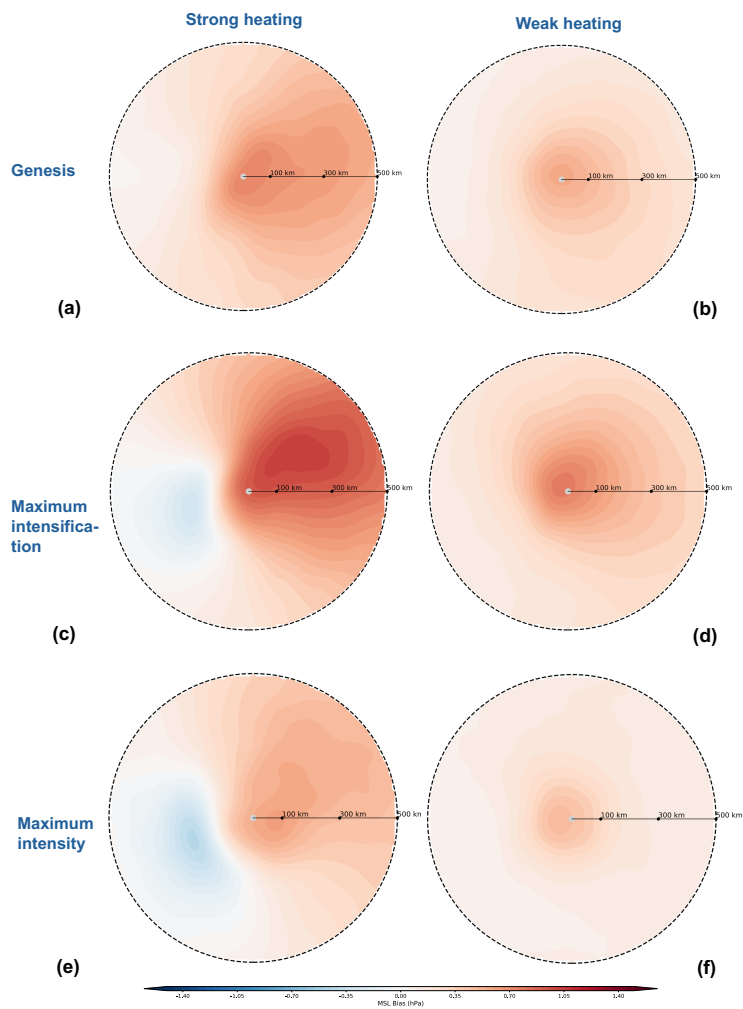

**Figure S1:** Bias of mean sea level pressure (MSLP, unit: hPa) for the (a, c, e) strong heating group and (b, d, f) weak heating group, composited at (a, b) genesis, (c, d) maximum intensification, and (e, f) maximum intensity time steps.

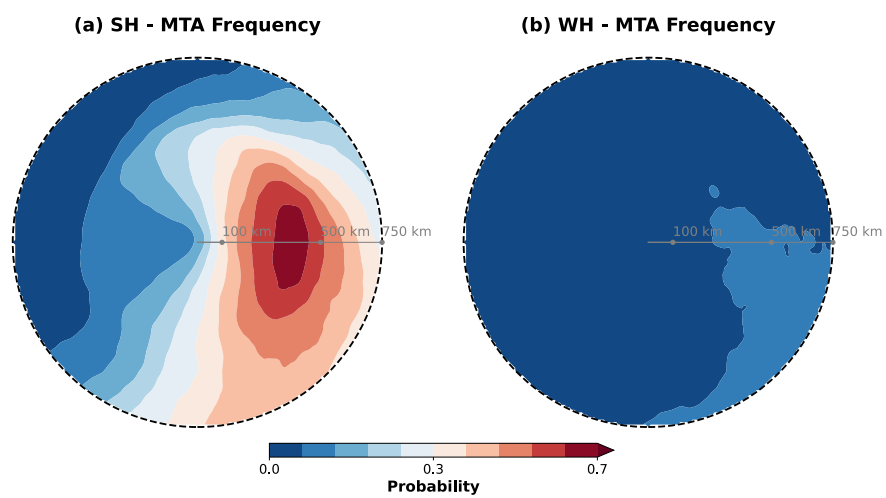

**Figure S2:** Cyclone-relative composite spatial frequency of Moist Transport Axis (MTA) for (a) strong heating (SH) group and (b) weak heating (WH) group.
